# Supplementary material
Source: PubMed Central journal article supplement (PMC4342234)
Supplement: NIHMS338161-supplement-01.pdf [file NIHMS338161-supplement-01.pdf]

DAF-16 target genes (Mark I didn't think FTT-2 affected gene expression, so I changed this, right?)

**Figure S1.** Quantitative PCR of *lips-17*, *dod-8*, *sod-3*, *gpd-2*, and *nnt-1* in germline-deficient animals with and without *daf-12* and *daf-16* mutations.

**Figure S2.** Effects of *phi-62* RNAi knockdown on *daf-16* target genes known to be affected by *tcer-1* RNAi knockdown (Ghazi *et al.* 2009).  $p < 0.01$  for control vs. *phi-62(RNAi)* in all three cases.

**Figure S3.** Effects of *phi-62* RNAi knockdown on insulin/IGF-1-pathway, respiration-defective and calorically-restricted mutants. A) *daf-2(e1370)*, vector-only control,  $n = 89$ ,  $m = 44.1$ ; *phi-62(RNAi)*,  $n = 59$ ,  $m = 40.2$ ,  $p < 0.2$ . B) *eat-2(ad1116)*, vector-only control,  $n = 23$ ,  $m = 27.4$ ; *phi-62(RNAi)*,  $n = 52$ ,  $m = 19.0$ ,  $p < 0.0001$ . C) *isp-1(qm150)*, vector-only control,  $n = 90$ ,  $m = 31.1$ ; *phi-62(RNAi)*,  $n = 39$ ,  $m = 20.5$ ,  $p < 0.0001$ . Second trial (not shown), *daf-2(e1370)*, vector-only control,  $n = 93$ ,  $m = 31.3$ ; *phi-62(RNAi)*,  $n = 78$ ,  $m = 27.2$ ,  $p < 0.25$ . ) *eat-2(ad1116)*, vector-only control,  $n = 90$ ,  $m = 28.1$ ; *phi-62(RNAi)*,  $n = 81$ ,  $m = 19.9$ ,  $p < 0.0001$ . *isp-1(qm150)*, vector-only control,  $n = 92$ ,  $m = 29.0$ ; *phi-62(RNAi)*,  $n = 81$ ,  $m = 22.5$ ,  $p < 0.0001$ .

**Figure S4.** Lifespan of *daf-16*; *glp-1* germline-deficient animals subjected to RNAi knockdown of *phi-62* or *ftt-2* using RNAi constructs from the Ahringer library. No further shortening of lifespan was observed.

**Figure S5.** DAF-16::GFP localization in *glp-1(-)* and wild-type animals upon knockdown of *ftt-2*, *par-5*, and *phi-62*.

**Figure S6.** Effects of *ftt-2* RNAi knockdown on expression of *dod-8* and *sod-3*. We note that this RNAi clone, from the Ahringer library, cross-reacts with the 14-3-3 protein *par-5*.

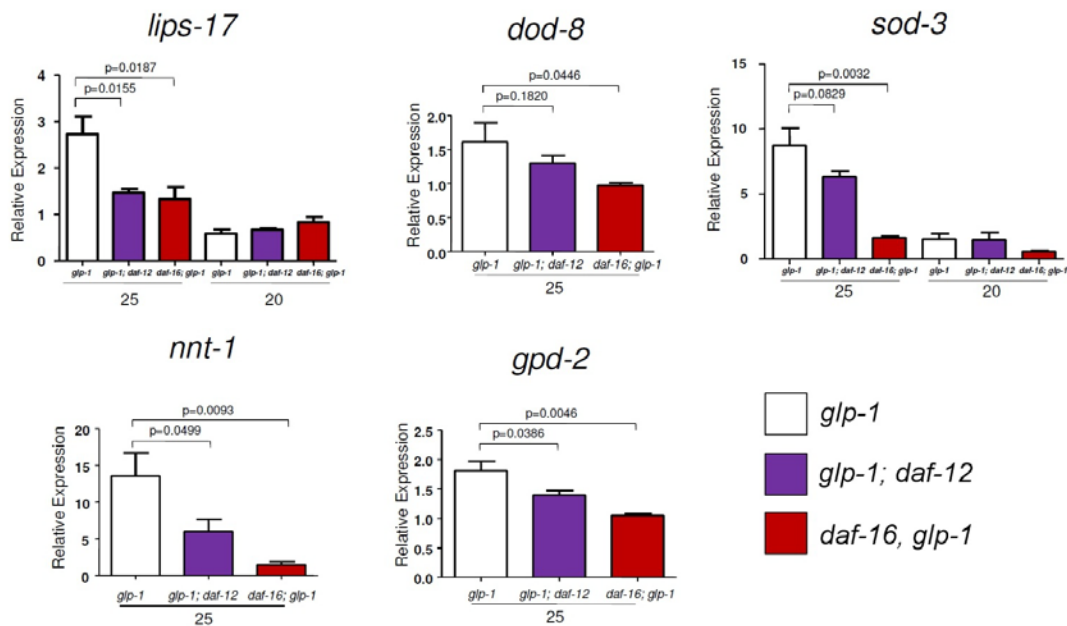

Figure S1.

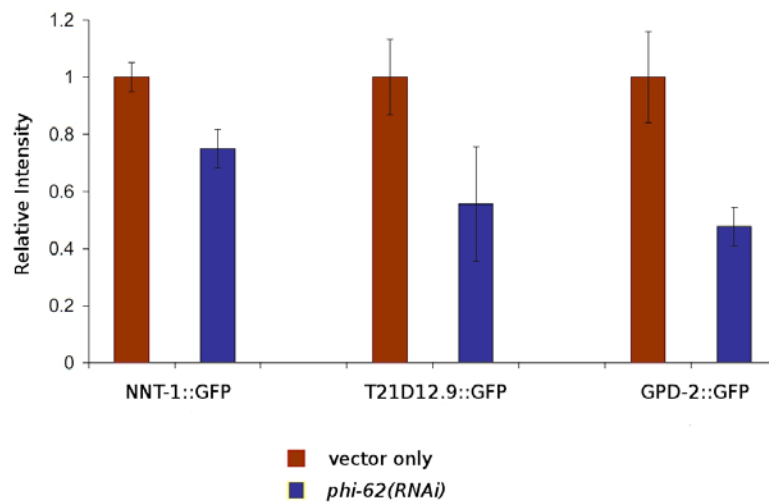

**Figure S2.**

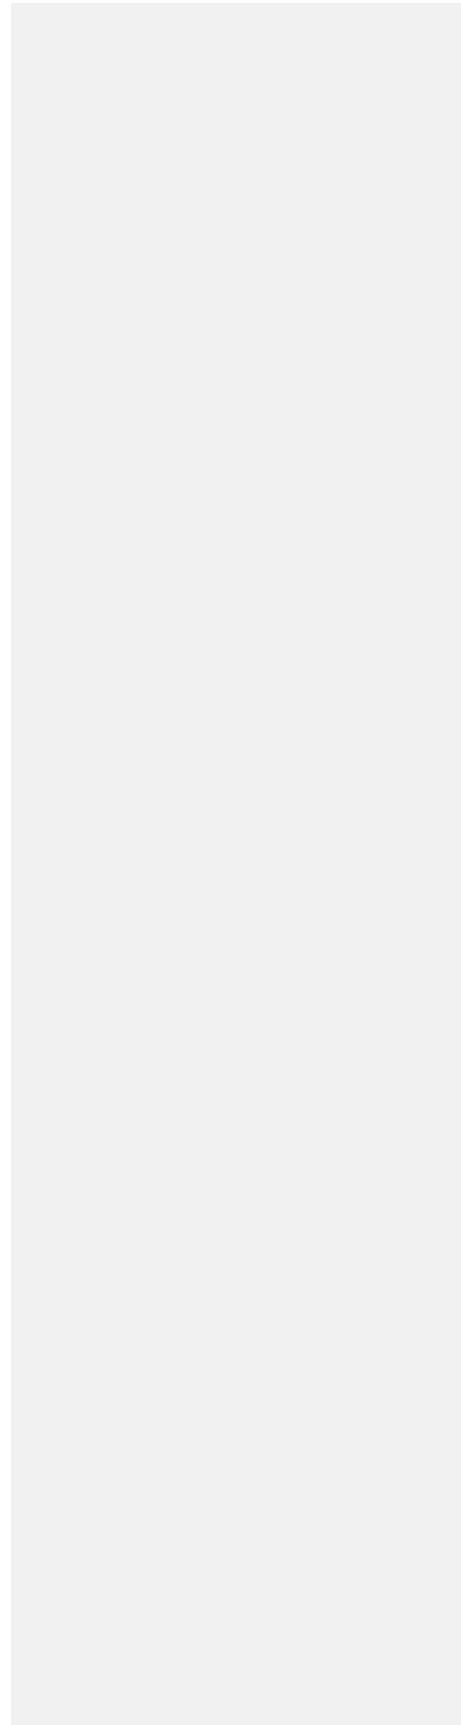

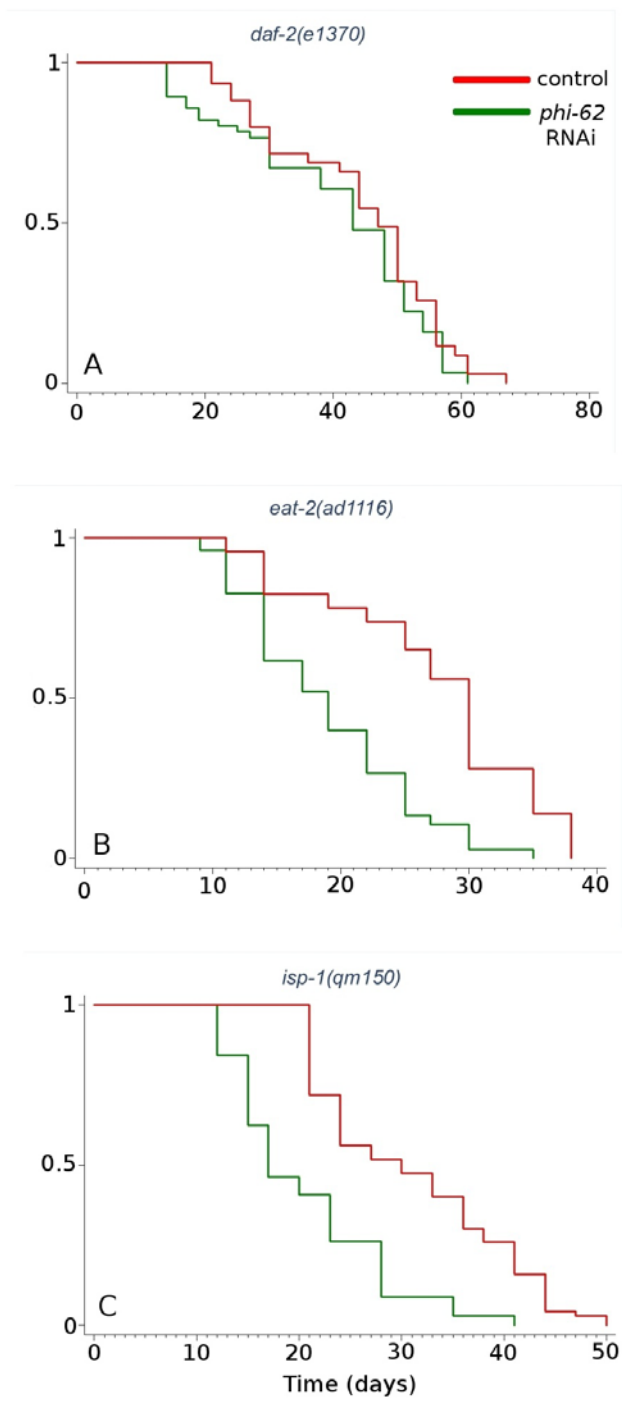

Figure S3.

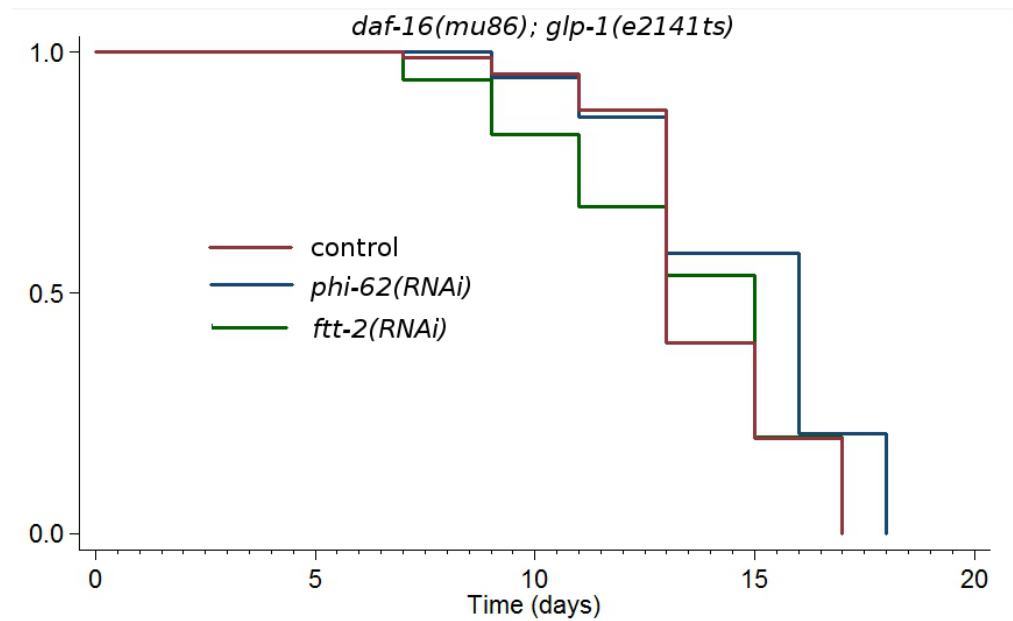

Figure S4.

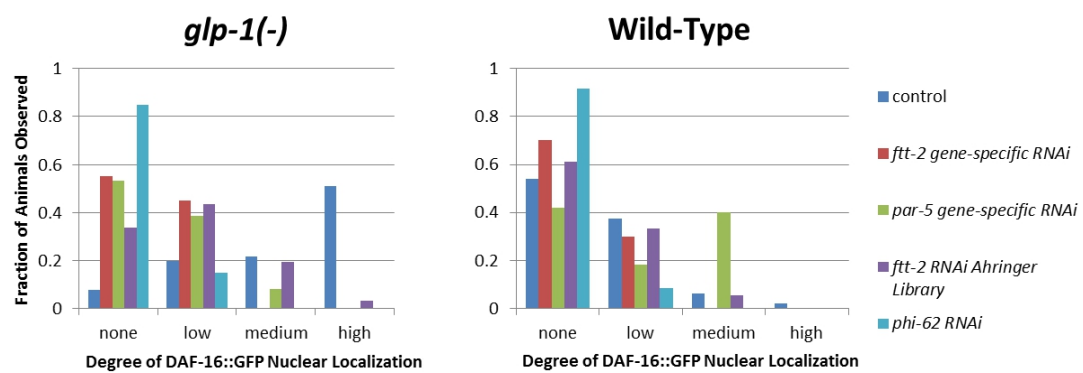

Figure S5.

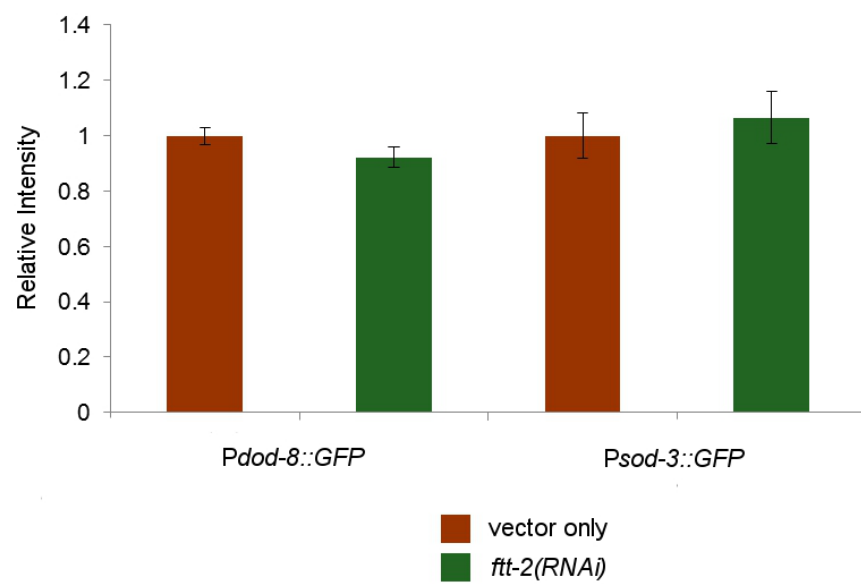

Figure S6.
